# Supplementary material
Source: publisher site journal article supplement (https://www.dovepress.com/article/161680)
Supplement: Supplementary file 1 [file get_supplementary_file.php]

## Supplementary materials

**Table S1. Recipes for a series of dosage forms**

| Formation | Agent type    | Ingredients |         | Drug content (w/w) |
|-----------|---------------|-------------|---------|--------------------|
|           |               | PVA(w/w)    | CS(w/w) |                    |
| F1        | 1% CS         | /           | 1%      | /                  |
| F2        | 5%PVA         | 5%          | /       | /                  |
| F3        | BFFS          | 5%          | 1%      | /                  |
| F4        | LFFS(0%CS)    | 5%          | /       | 0.5%               |
| F5        | LFFS(0%PVA)   | /           | 1%      | 0.5%               |
| F6        | LFFS(2.5%PVA) | 2.5%        | 1%      | 0.5%               |
| F7        | LFFS(5%PVA)   | 5%          | 1%      | 0.5%               |
| F8        | LFFS(7.5%PVA) | 7.5%        | 1%      | 0.5%               |
| F9        | LFFS(10%PVA)  | 10%         | 1%      | 0.5%               |
| F10       | BZL           | /           | /       | 0.5%               |

**Table S2. MIC value of a series of dosage forms**

| Formation. | Agent type    | Concentration of BZL content in a series of dosage forms( $\mu\text{g/mL}$ ) |       |      |      |      |     |      |      |      | MIC( $\mu\text{g/mL}$ ) |
|------------|---------------|------------------------------------------------------------------------------|-------|------|------|------|-----|------|------|------|-------------------------|
|            |               | 0                                                                            | 0.625 | 1.43 | 2.50 | 3.33 | 5.0 | 6.67 | 10.0 | 20.0 |                         |
| F1         | 1% CS         | +                                                                            | /     | /    | /    | /    | /   | /    | /    | /    | /                       |
| F2         | 5% PVA        | +                                                                            | /     | /    | /    | /    | /   | /    | /    | /    | /                       |
| F3         | BFFS          | +                                                                            | /     | /    | /    | /    | /   | /    | /    | /    | /                       |
| F4         | LFFS(0%CS)    | /                                                                            | +     | +    | -    | -    | -   | -    | -    | -    | 2.5                     |
| F5         | LFFS(0%PVA)   | /                                                                            | +     | +    | +    | +    | -   | -    | -    | -    | 5.0                     |
| F6         | LFFS(2.5%PVA) | /                                                                            | +     | +    | -    | -    | -   | -    | -    | -    | 2.5                     |
| F7         | LFFS(5%PVA)   | /                                                                            | +     | -    | -    | -    | -   | -    | -    | -    | 1.43                    |
| F8         | LFFS(7.5%PVA) | /                                                                            | +     | +    | -    | -    | -   | -    | -    | -    | 2.5                     |
| F9         | LFFS(10%PVA)  | /                                                                            | +     | +    | -    | -    | -   | -    | -    | -    | 2.5                     |
| F10        | BZL           | /                                                                            | +     | +    | +    | +    | -   | -    | -    | -    | 5.0                     |

+: positive, -: negative.

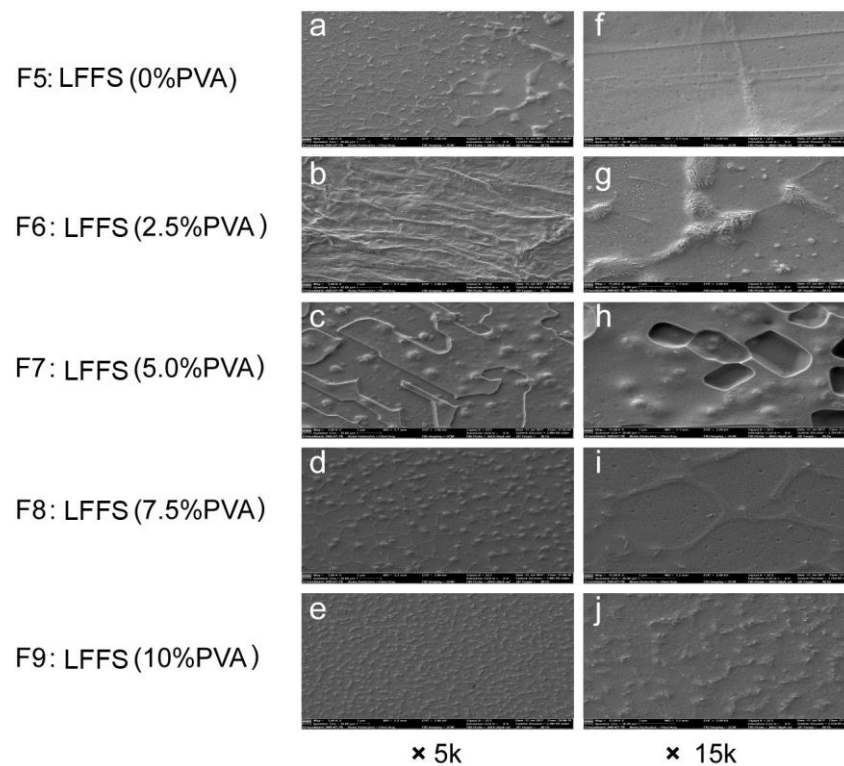

**Fig.S1. Morphology of the series of LFFS observe SEM**

**Notes:** The SEM figures of a series of LFFS formations from F5 to F9 containing different contents of PVA diluted 100-fold with water are showed in the Fig. S1a to Fig. S1j. From the SEM figures, F7 (LFFS of 5% PVA) has appeared a different structure which is blocky

and straculate attaching more drug particles superficially (Fig. S1c and Fig. S1h). However, the other LFFS formulations (0%, 2.5%, 7.5%, 10% PVA) haven't appeared hole structures. F5, F8, F9 all appear dispersed particle states (Fig. S1a, Fig. S1d, and Fig. S1e) and F2 shows a dendrite shape (Fig. S1b) with an amplification of 5k. With an amplification of 15k, the Fig.S1i and Fig. S1j of F8 and F9 (LFFS of 7.5%, 10% PVA) have appeared reticular structures, and F5 is strip-shaped (Fig. S1f), and F6 is fusiform (Fig. S1g).

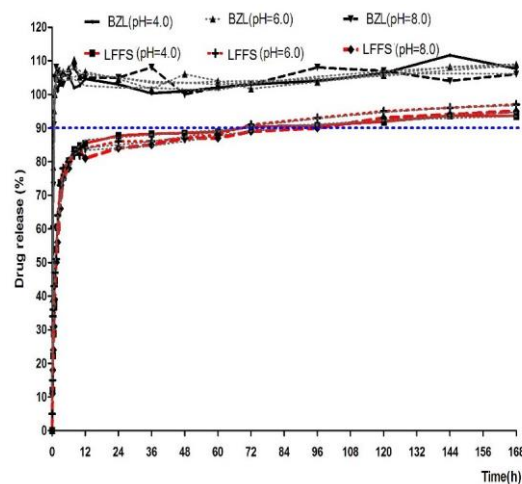

**Fig. S2 Effect of different pH values of PBS on BZL release profiles**

**Notes:** The release profiles of LFFS and BZL in PBS at different pH values (pH=4.0, 6.0, 8.0) at 37 °C. When the release rates of BZL at

different pH values (pH=4.0, 6.0, 8.0) come up to 90%, it all cost 45min; however, LFFS need 72h at pH=4.0, 72h at pH=6.0, and 90h at pH=8.0.

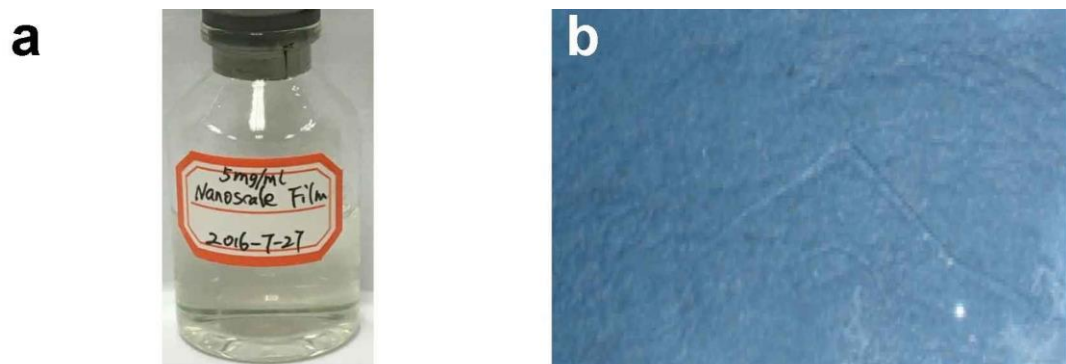

**Fig. S3 The appearance and film forming ability.**

**Notes:** (a) The LFFS films with 5 mg/mL BZL were transparent and clear. (b) We could conclude through the whole process of film formation that the time span of the film formation was 2min and the maintenance time span was approximately 3 to 5 hours on the glass slide.

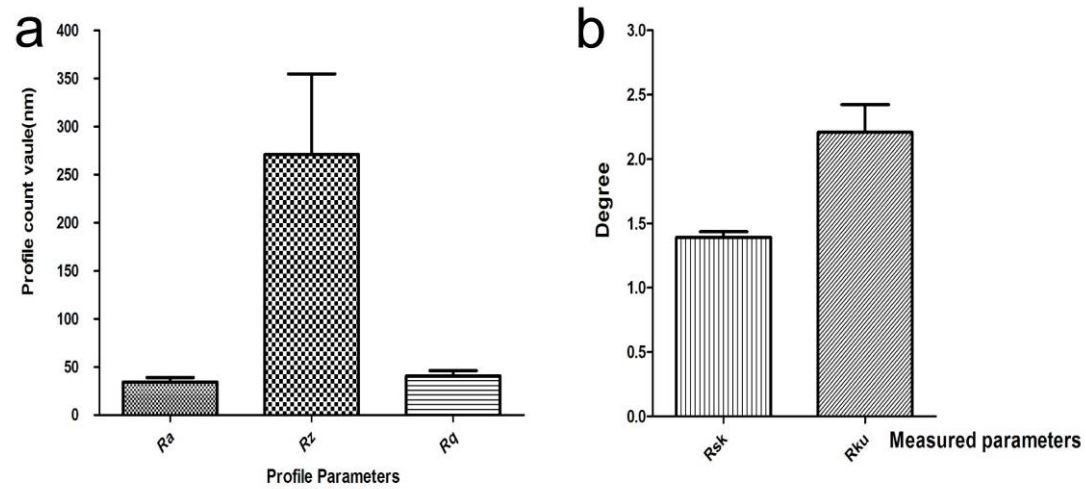

**Fig. S4. The AFM parameters of LFFS**

**Notes:** (a) The three section parameters, namely, mean square roughness ( $R_q$ ), mean roughness depth ( $R_z$ ), mean roughness average ( $R_a$ ) were  $40.541 \pm 13.856$  nm,  $270.95 \pm 205.611$  nm and  $34.304 \pm 11.461$  nm. (b) The surveying parameters Kurtosis ( $R_{ku}$ ) and skewness ( $R_{sk}$ ) of LFFS were  $2.208 \pm 0.525$  and  $1.392 \pm 0.104$ , respectively.

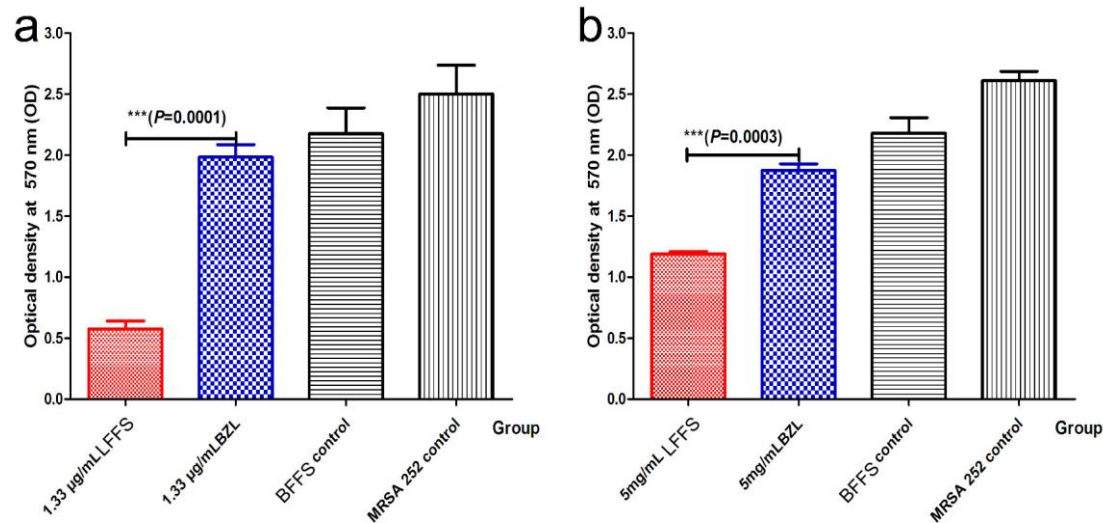

**Fig. S5. Biofilms quantification of formatting inhibition and clearance**

**Notes:** (a) MRSA biofilm formation was inhibited by exposed to LFFS at 1.33 µg/ml for 24 hours. (b) MRSA biofilm was cleared by exposed to LFFS at 5 mg/ml for 8 hours. Compared with BZL, LFFS is much more capable of clearing biofilms. \*\*\* $P < 0.001$  represent an extremely significant difference, \*\* $P < 0.01$  represent a significant difference, \* $P < 0.05$  represent a difference ( $n=3$ ).

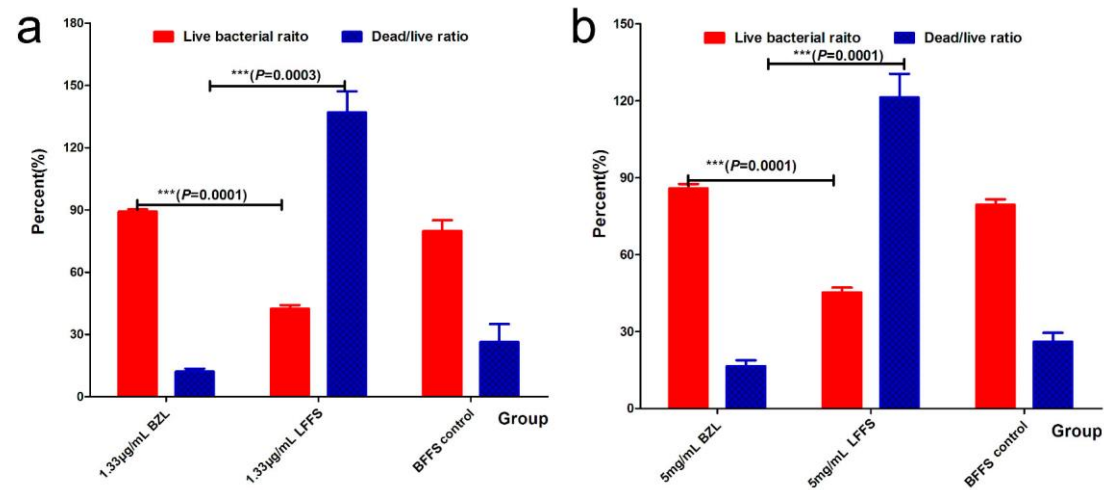

**Fig. S6. The live bacteria and dead/live ratio treated with LFFS**

**Notes:** (a) Living bacteria ratio in the 1.33 µg/mL BZL disposed samples. (b) Living bacteria ratio in the 5 mg/mL BZL disposed samples.

It is obvious that LFFS works better in clearance biofilms than BZL. \*\*\*P < 0.001 represent an extremely significant difference, \*\*P < 0.01 represent a significant difference, \*P < 0.05 represent a difference (n=3).



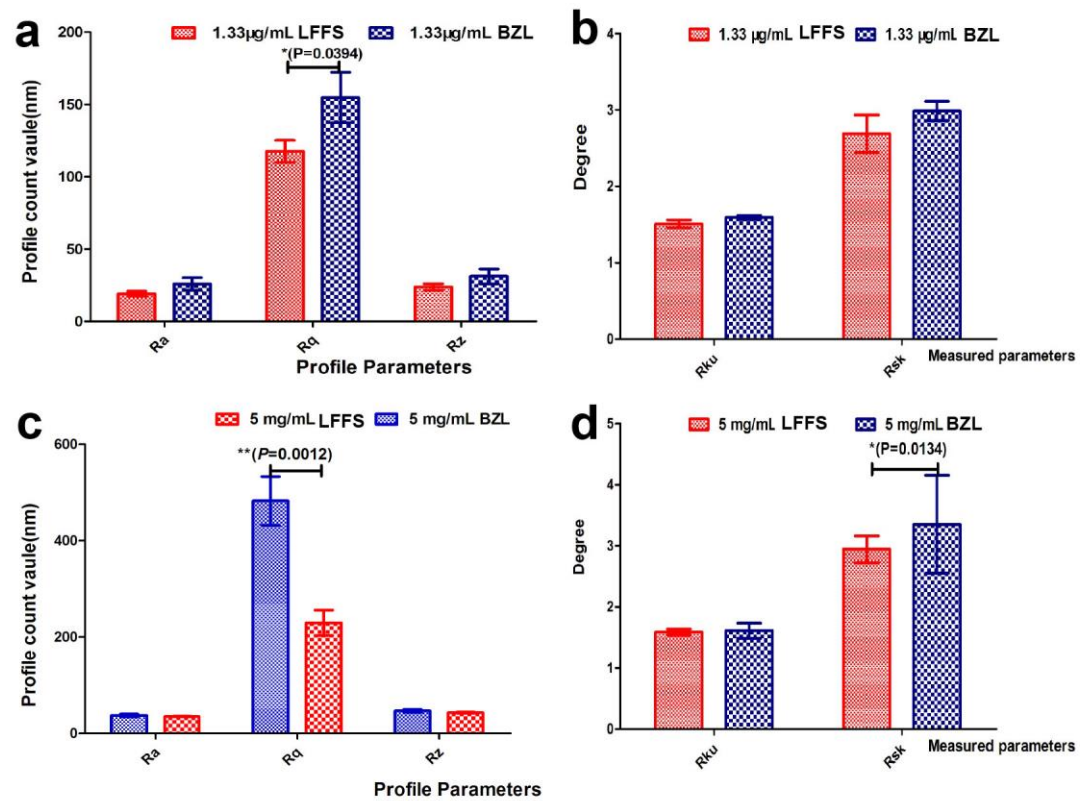

**Fig. S7. The three section parameters and surveying parameters of biofilms formation quantification**

**Notes:** (a) Rq, Rz and Ra of the biofilms disposed with LFFS and BZL at 1.33 µg/mL. (b) Rku and Rsk of the biofilms disposed with LFFS

and BZL at 1.33  $\mu\text{g}/\text{mL}$ . (c)  $R_q$ ,  $R_z$  and  $R_a$  of the biofilms disposed with LFFS and BZL at 5  $\text{mg}/\text{mL}$ . (d)  $R_{ku}$  and  $R_{sk}$  of the biofilms disposed with LFFS and BZL at 5  $\text{mg}/\text{mL}$ . Equally, as clearly implied, the removal competence for biofilms of BZL is mildly less than that of LFFS at the identical density for the identical time. \*\*\* $P < 0.001$  represent an extremely significant difference, \*\* $P < 0.01$  represent a significant difference, \* $P < 0.05$  represent a difference ( $n=3$ ).
